# Supplementary material for: Compliance with Nutritional Recommendations and Gut Microbiota Profile in Galician Overweight/Obese and Normal-Weight Individuals
Source: MDPI journal article supplement (doi:10.3390/nu15153418), 2023-08-01
Supplement: s1 [file s1]

## Supplementary Material

**Table S1.** Participants' diet quality by sex, in terms of caloric profile and lipid quality: adequacy to nutritional objectives for the Spanish population.

| CALORIC PROFILE          | Nutritional objectives                 | Females (n=67)     |                        | Males (n=41)       |                        | <i>p</i> Value |
|--------------------------|----------------------------------------|--------------------|------------------------|--------------------|------------------------|----------------|
|                          |                                        | Average $\pm$ SD   | Intake adequacy: n (%) | Average $\pm$ SD   | Intake adequacy: n (%) |                |
| Protein (% Energy)       | 10 – 15 %                              | 16.6 $\pm$ 3.5     | 27 (40.3%)             | 16.7 $\pm$ 3.5     | 14 (34.1%)             | 0.317          |
| Carbohydrates (% Energy) | 50 -55 %                               | 38.9 $\pm$ 7.8     | 7 (10.4%)              | 38.7 $\pm$ 3.8     | 3 (7.3%)               | 0.197          |
| Lipids (% Energy)        | 30 – 35 %                              | 41.8 $\pm$ 8.0     | 10 (14.9%)             | 42.1 $\pm$ 7.9     | 5 (12.2%)              | 0.360          |
| Fiber (g/1000 kcal)      | >14                                    | 11.7 $\pm$ 7.7     | 10 (14.9%)             | 11.5 $\pm$ 7.7     | 5 (12.2%)              | 0.137          |
| <b>LIPID PROFILE</b>     |                                        |                    |                        |                    |                        |                |
| SFA (% Energy)           | $\leq 7 - 8$                           | 11.32 $\pm$ 2.4    | 9 (13.43%)             | 13.06 $\pm$ 3.9    | 4 (9.8%)               | 0.005          |
| MUFA (% Energy)          | 20                                     | 20.8 $\pm$ 16.1    | 24 (35.8%)             | 20.9 $\pm$ 16.3    | 19 (46.3%)             | 0.635          |
| PUFA (% Energy)          | 5                                      | 6.3 $\pm$ 4.3      | 12 (17.6%)             | 5.2 $\pm$ 1.5      | 12 (29.3%)             | 0.121          |
| Cholesterol (mg)         | < 300 mg                               | 347.0 $\pm$ 138.6  | 28 (41.8%)             | 347.0 $\pm$ 138.6  | 13 (31.7%)             | 0.074          |
| <b>OTHER</b>             |                                        |                    |                        |                    |                        |                |
| Water (ml)               | 2000 ml                                | 2075.2 $\pm$ 642.9 | 36 (53.7%)             | 2119.3 $\pm$ 612.4 | 23 (56.1%)             | 0.752          |
| Fruits and vegetables    | 5 portions                             | 1.7 $\pm$ 1.4      | 3 (4.5%)               | 1.8 $\pm$ 1.7      | 2 (4.8%)               | 0.844          |
| Sugar (% Energy)         | 6 - 10                                 | 17.9 $\pm$ 5.9     | 6 (8.9%)               | 18.3 $\pm$ 9.5     | 7 (17.1%)              | 0.791          |
| Alcohol (g)              | $\leq 1$ SDU women<br>$\leq 2$ SDU men | 3.3 $\pm$ 9.8      | 62 (92.5%)             | 4.6 $\pm$ 6.6      | 38 (92.7%)             | 0.559          |

Results expressed with mean  $\pm$  standard deviation; SFA: Saturated Fatty Acids; MFA: Monounsaturated Fatty Acids; PUFA: Polyunsaturated Fatty Acids. Diet adequacy is expressed as the number of individuals meeting the nutritional goals. Expressed as n (%).

**Table S2.** Micronutrient intake and adequation to the Dietary Reference Intakes (DRI) for the Spanish population in women and men

|                                        | Females (n=67) |      |                     |                          | Males (n=41) |      |                     |                          | <i>p Value</i> |
|----------------------------------------|----------------|------|---------------------|--------------------------|--------------|------|---------------------|--------------------------|----------------|
|                                        | RDI            | UL   | Average $\pm$ SD    | Intake adequacy<br>n (%) | RDI          | UL   | Average $\pm$ SD    | Intake adequacy<br>n (%) |                |
| <b>Thiamine</b>                        | 1              | -    | 1.4 $\pm$ 0.4       | 58 (86.6%)               | 1.2          | -    | 1.87 $\pm$ 1.0      | 34 (89.9%)               | 0.003          |
| <b>Riboflavin (mg)</b>                 | 1.3            | -    | 1.7 $\pm$ 0.4       | 54 (80.6%)               | 1.6          | -    | 2.03 $\pm$ 0.6      | 34 (82.9%)               | 0.001          |
| <b>Niacin (mg)</b>                     | 14             | 35   | 31.6 $\pm$ 10.2     | 48 (71.6%)               | 17           | 35   | 37.98 $\pm$ 13.9    | 23 (56.1%)               | 0.007          |
| <b>Vitamin B6 (<math>\mu</math>g)</b>  | 1.2            | 25   | 1.9 $\pm$ 0.6       | 61 (91.0%)               | 1.5          | 25   | 2.41 $\pm$ 1.1      | 38 (92.7%)               | 0.003          |
| <b>Folic acid (<math>\mu</math>g)</b>  | 300            | 1000 | 262.0 $\pm$ 87.5    | 20 (29.8%)               | 300          | 1000 | 289.4 $\pm$ 129.1   | 11 (26.8%)               | 0.192          |
| <b>Vitamin B12 (<math>\mu</math>g)</b> | 2              | -    | 5.7 $\pm$ 4.6       | 67 (100%)                | 2            | -    | 6.62 $\pm$ 3.3      | 41 (100%)                | 0.228          |
| <b>Vitamin C (mg)</b>                  | 60             | -    | 158.5 $\pm$ 79.0    | 62 (92.5%)               | 60           | -    | 159.7 $\pm$ 80.4    | 39 (95.1%)               | 0.940          |
| <b>Vitamin A (<math>\mu</math>g)</b>   | 600            | 3000 | 711.3 $\pm$ 432.9   | 38 (56.7%)               | 700          | 3000 | 856.8 $\pm$ 583.3   | 22 (53.7%)               | 0.141          |
| <b>Vitamin D (<math>\mu</math>g)</b>   | 5              | 100  | 4.0 $\pm$ 5.4       | 21 (31.3%)               | 5            | 100  | 3.9 $\pm$ 5.3       | 9 (22.0%)                | 0.950          |
| <b>Vitamin E (mg)</b>                  | 15             | 300  | 5.9 $\pm$ 3.5       | 3 (4.5%)                 | 15           | 300  | 10.0 $\pm$ 12.0     | 8 (19.5%)                | 0.009          |
| <b>Calcium (mg)</b>                    | 1000           | 2500 | 756.7 $\pm$ 321.2   | 13 (19.4%)               | 900          | 2500 | 822.0 $\pm$ 404.6   | 16 (39.0%)               | 0.356          |
| <b>Magnesium (mg)</b>                  | 300            | -    | 318.3 $\pm$ 88.9    | 37 (55.2%)               | 350          | -    | 361.2 $\pm$ 135.0   | 19 (46.3%)               | 0.772          |
| <b>Potassium (mg)</b>                  | 3100           | -    | 3423.8 $\pm$ 849.6  | 43 (64.2%)               | 3100         | -    | 3695.5 $\pm$ 1236.5 | 29 (70.7%)               | 0.179          |
| <b>Phosphorus (mg)</b>                 | 700            | -    | 1436.7 $\pm$ 3810   | 65 (97.0%)               | 700          | -    | 1655 $\pm$ 575.2    | 39 (95.1%)               | 0.019          |
| <b>Iron (mg)</b>                       | 15             | -    | 15.1 $\pm$ 4.8      | 32 (47.8%)               | 9            | -    | 18.6 $\pm$ 8.8      | 41 (100%)                | 0.008          |
| <b>Iodine (<math>\mu</math>g)</b>      | 150            | 600  | 259.5 $\pm$ 158.9   | 43 (64.2%)               | 150          | 600  | 288.0 $\pm$ 211.8   | 23 (56.1%)               | 0.427          |
| <b>Zinc (mg)</b>                       | 7              | 25   | 10.9 $\pm$ 3.3      | 62 (92.5%)               | 9.5          | 25   | 26.6 $\pm$ 77.3     | 28 (68.3%)               | 0.098          |
| <b>Sodium (mg)</b>                     | 1300           | -    | 3855.0 $\pm$ 1300.3 | 4 (6.0%)                 | 1300         | -    | 4156.8 $\pm$ 1779.4 | 2 (4.9%)                 | 0.312          |

RDI: Recommended Daily Intake; UL: Tolerable Upper Intake Level; -: No adequate data to derive a UL. Results expressed as average  $\pm$  standard deviation (SD). Differences in continuous variable were examined using T-student for parametric variable and using Wilcoxon rank-sum for non-parametric variables. Statistical significance was set at *p* value < 0.05.

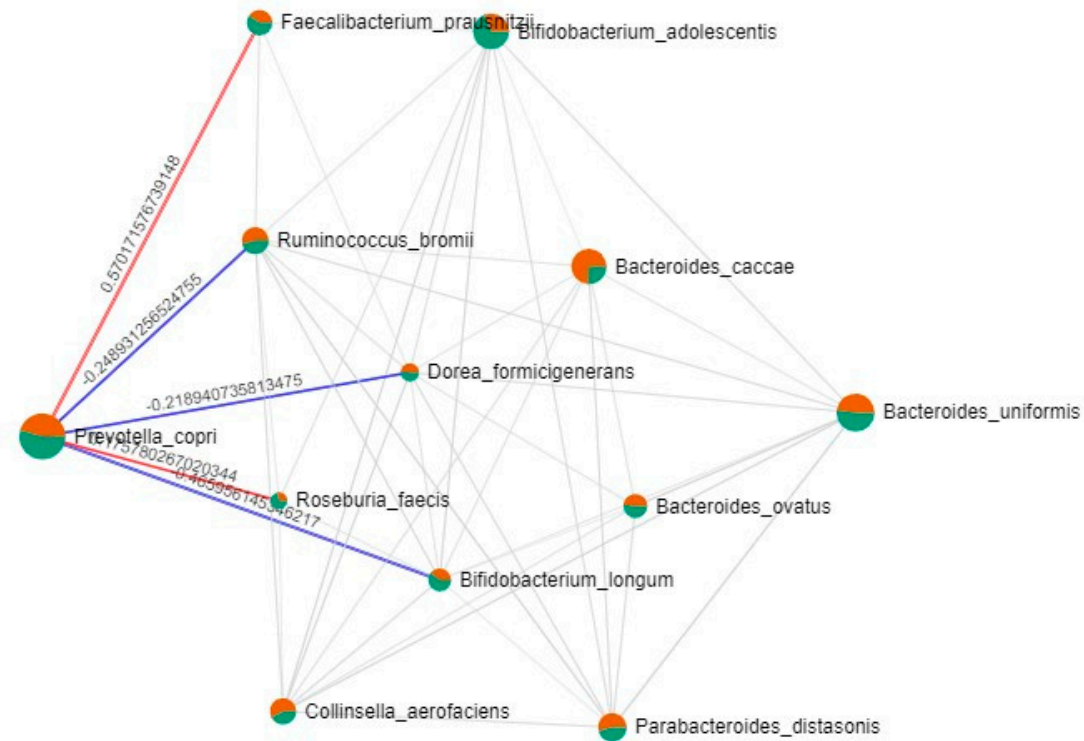

**Figure S1.** Correlation analysis. Figures show the obtained results for the correlation analysis between identified bacterial species and BMI of individual (NW in red and OW/OB in green, groups) Red lines showed a positive correlation among bacterial species whereas blue lines showed a negative correlation.
